# Supplementary material for: Microdose lithium improves behavioral deficits and modulates molecular mechanisms of memory formation in female SAMP-8, a mouse model of accelerated aging
Source: PubMed Central journal article supplement (PMC10994667; doi:10.1371/journal.pone.0299534), 2024-04-04

NMDA

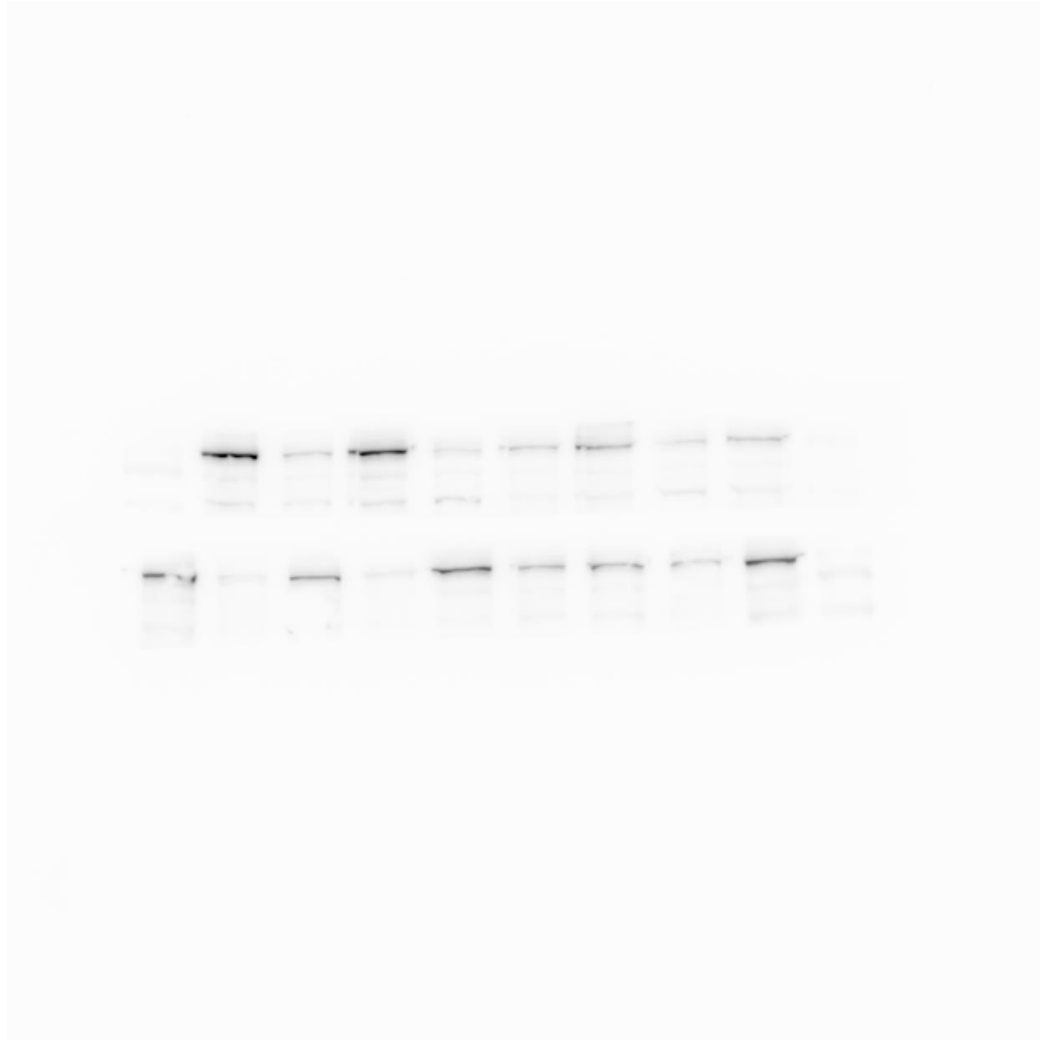

AMPA

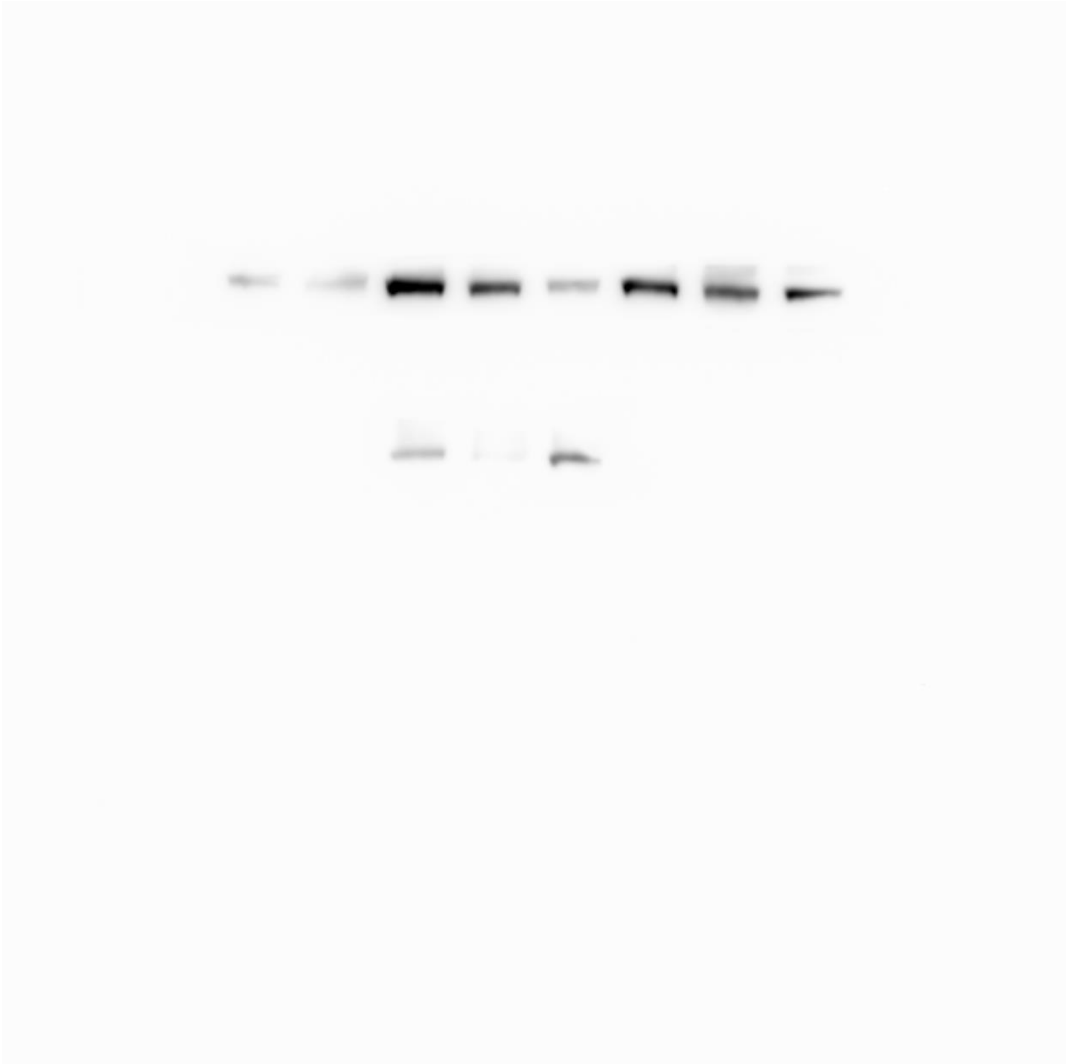

PSD95

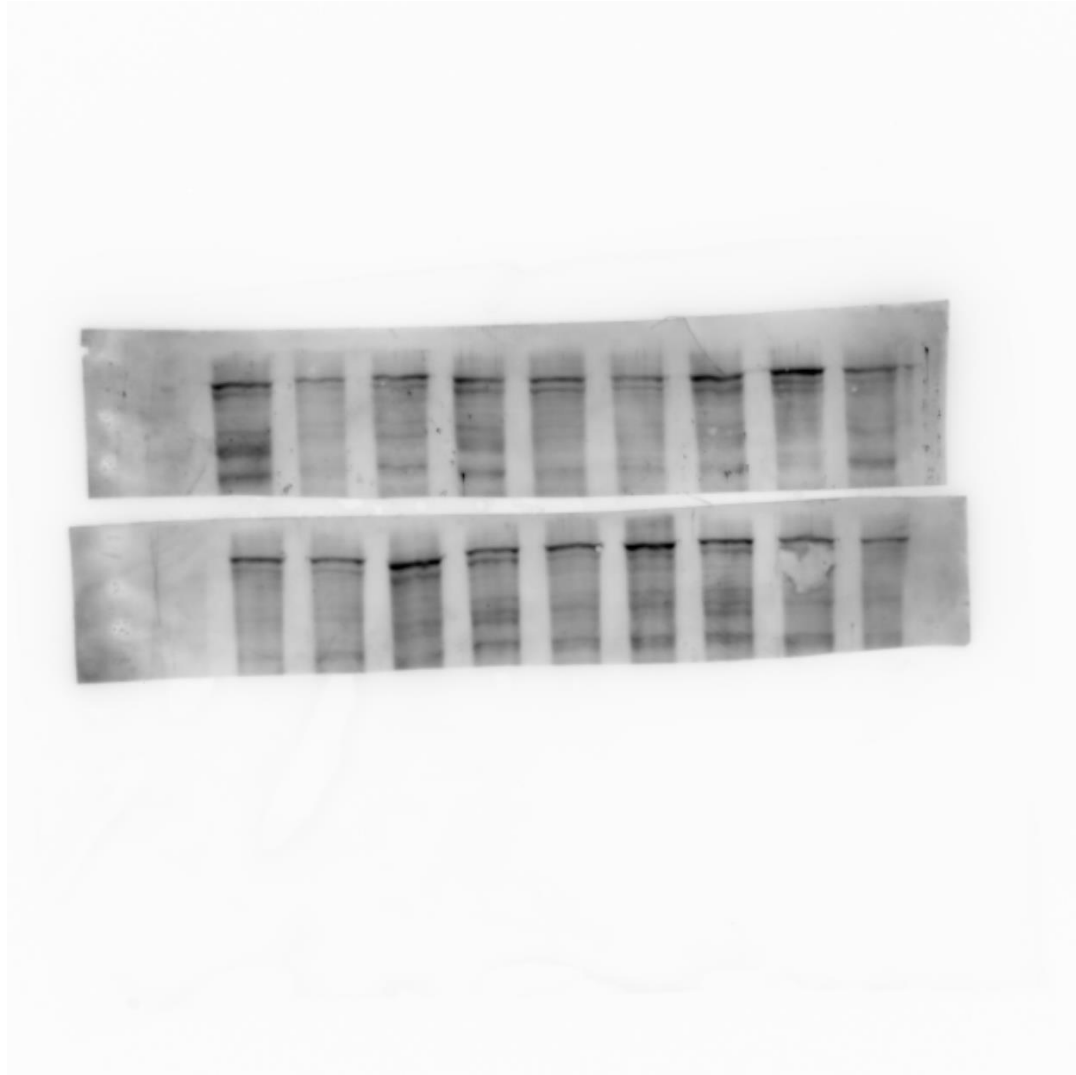

CaMK IV

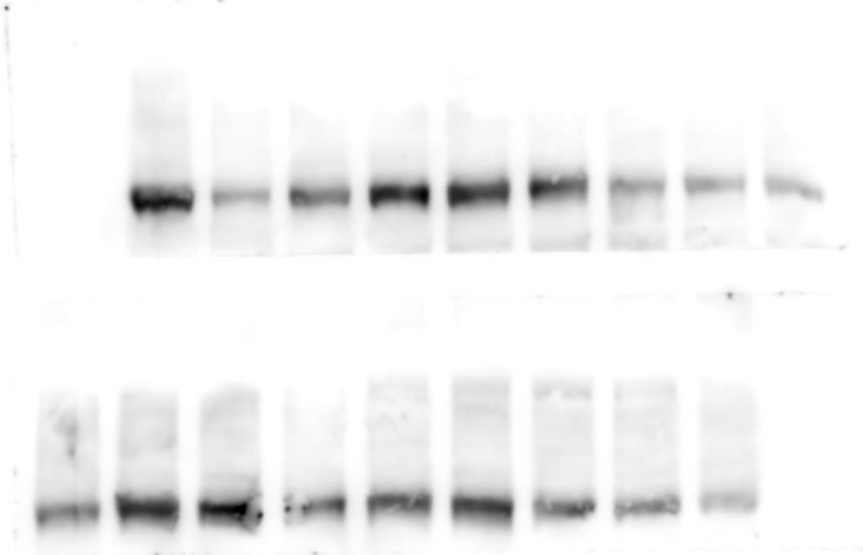

Alpha 7

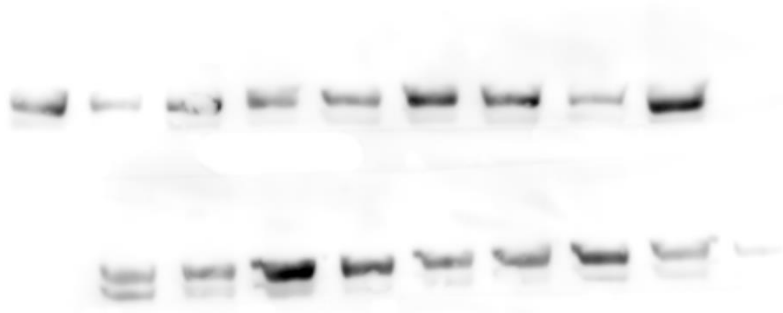

GABA<sub>A</sub>

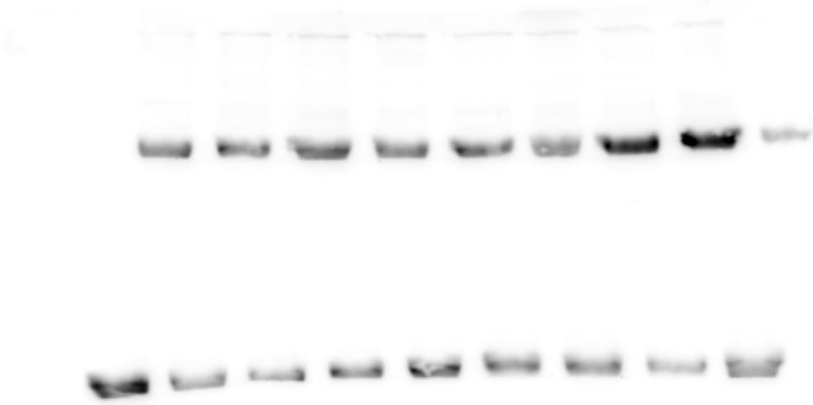

Synaptophysin

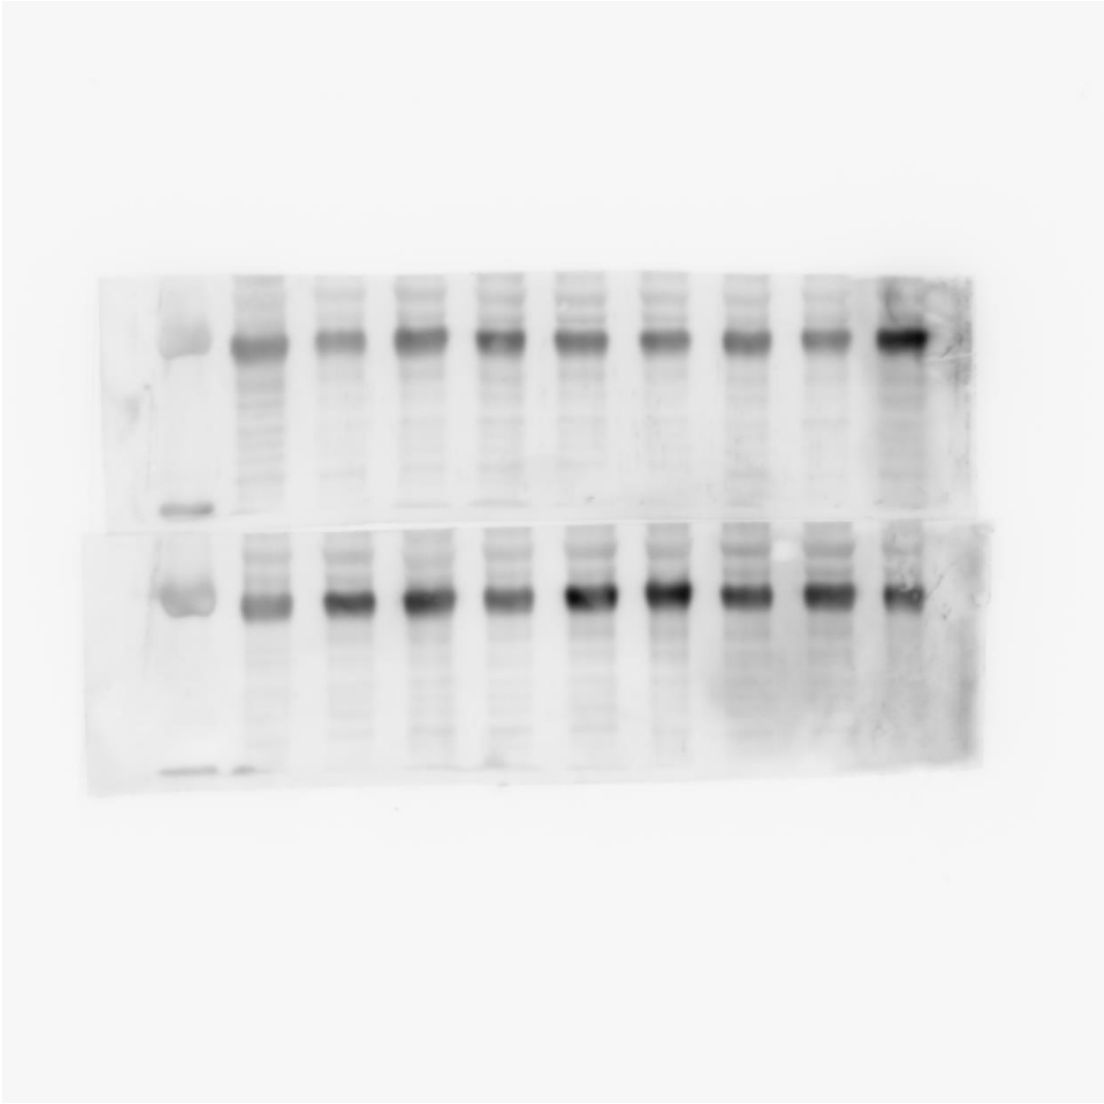

GSK3b

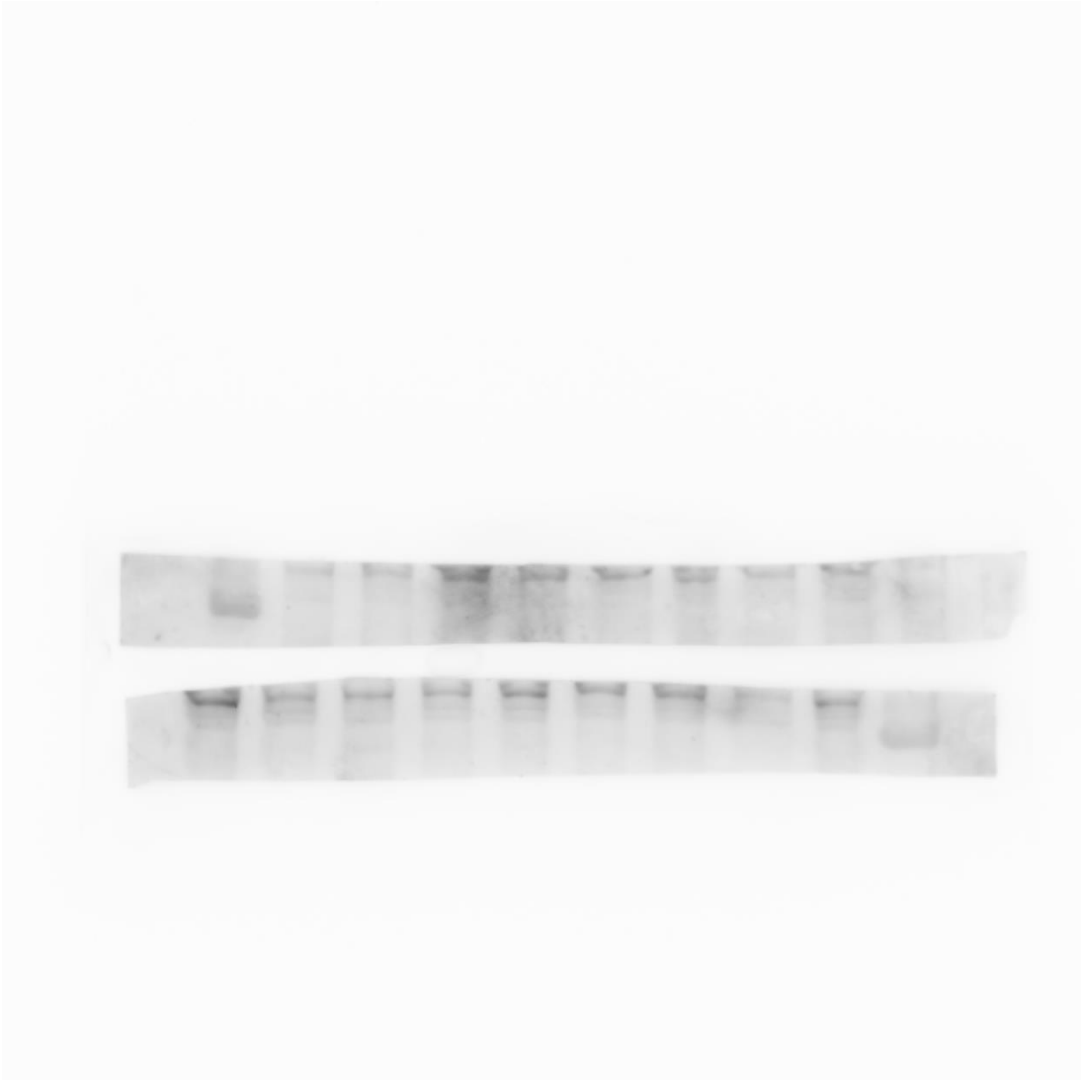



pGSK3b

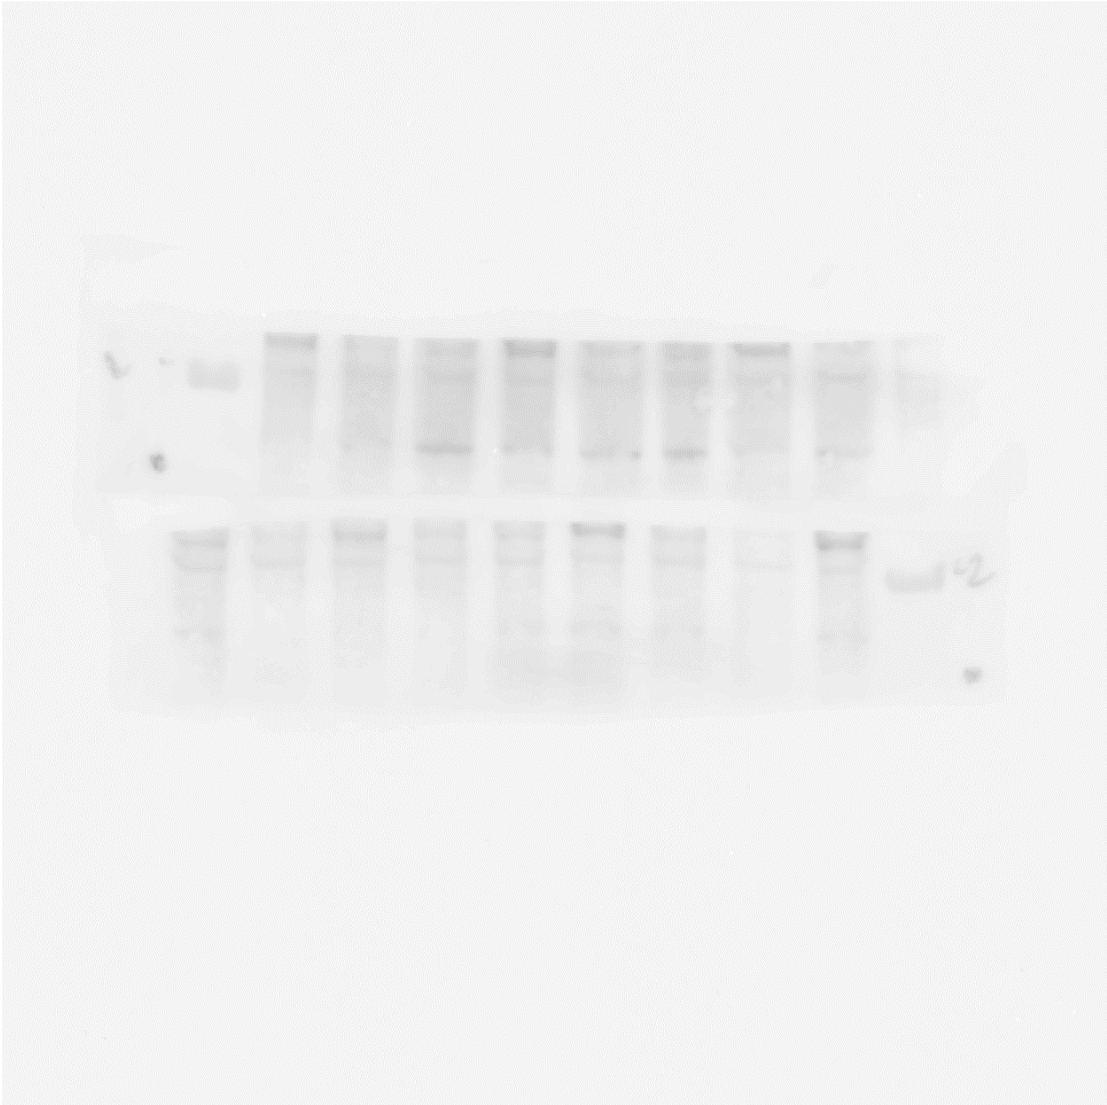

Actin (ctl of other proteins)

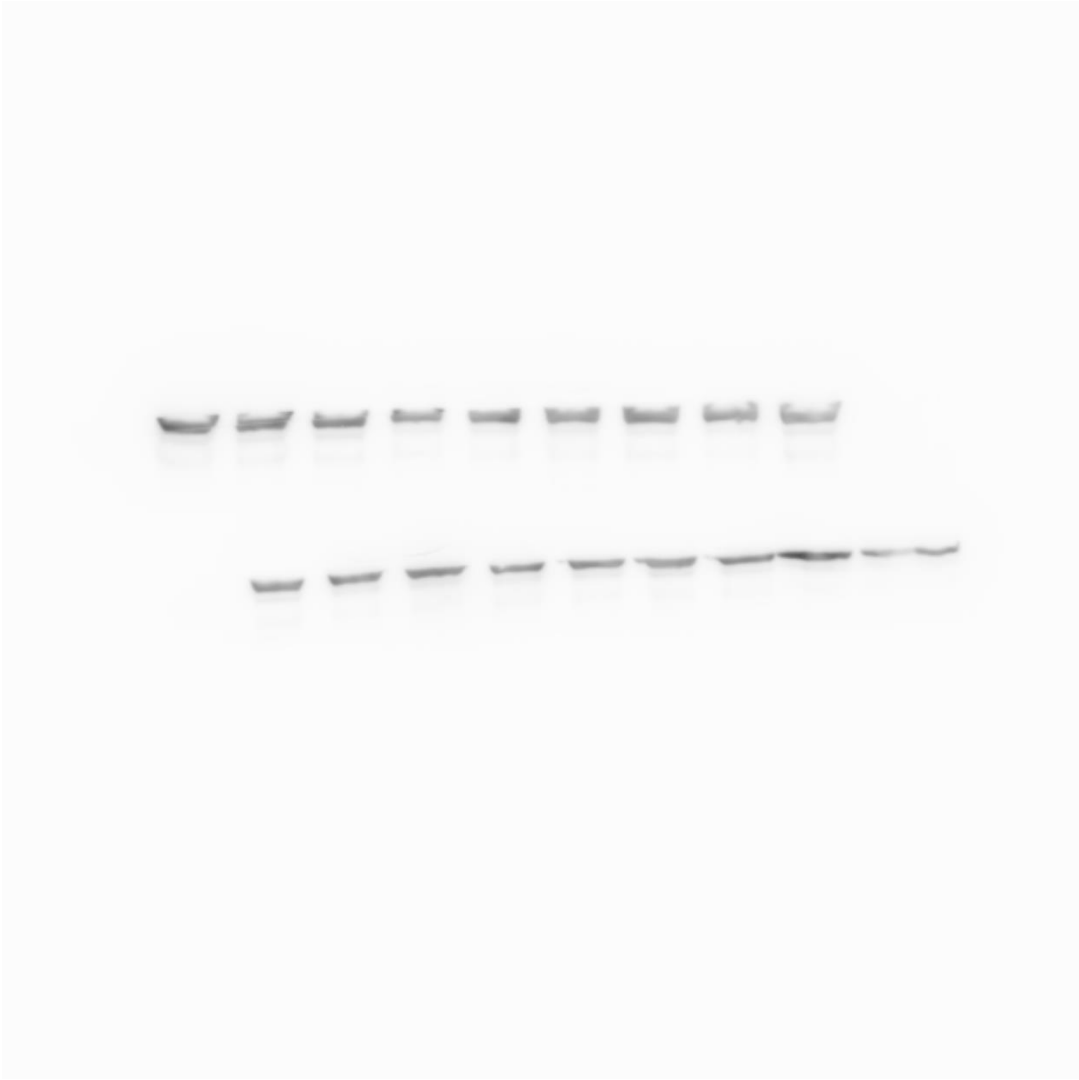

Actin (ctl CaMK)

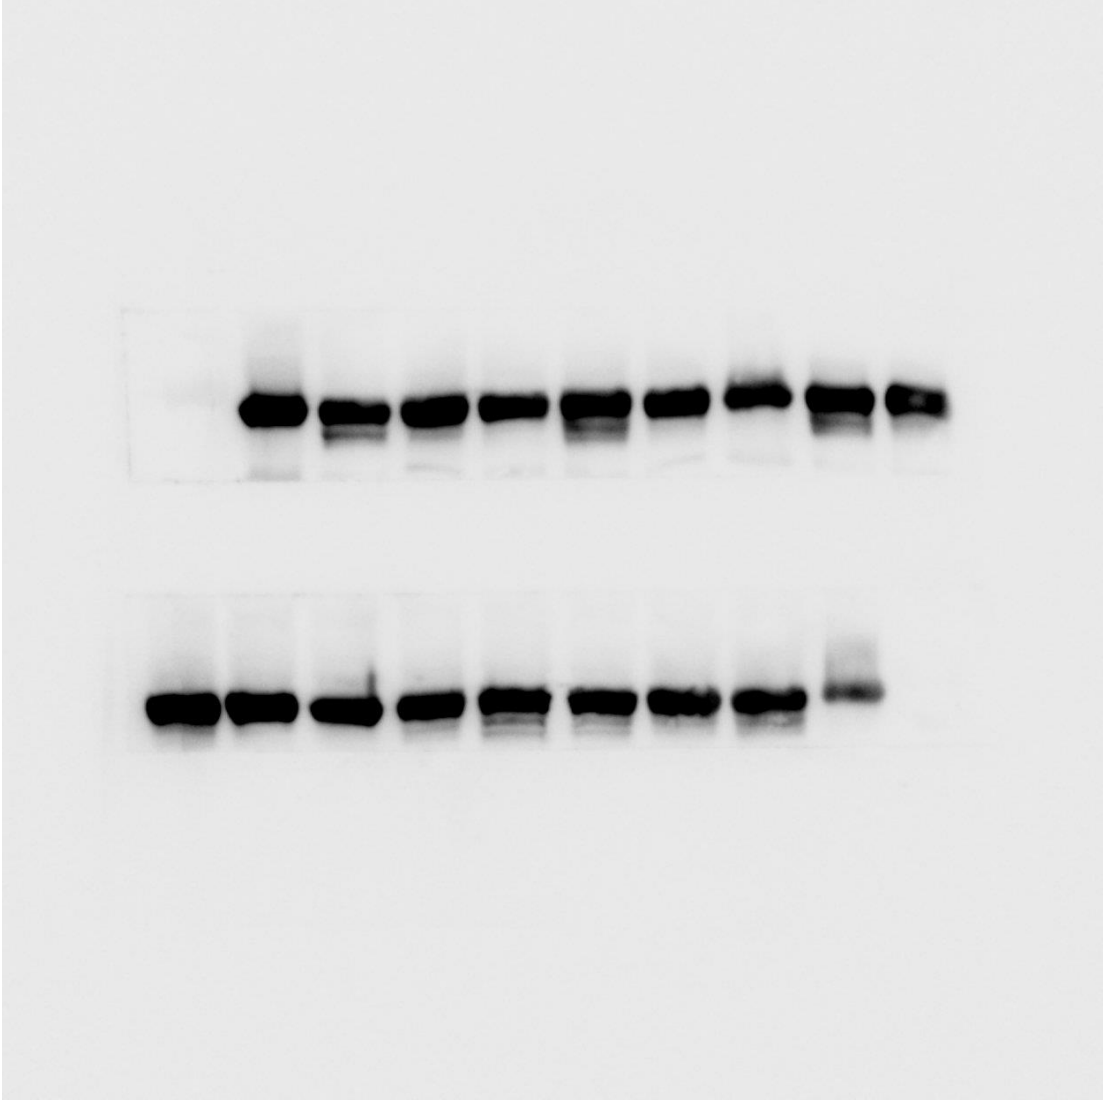

Ponceau (ctl of other proteins)

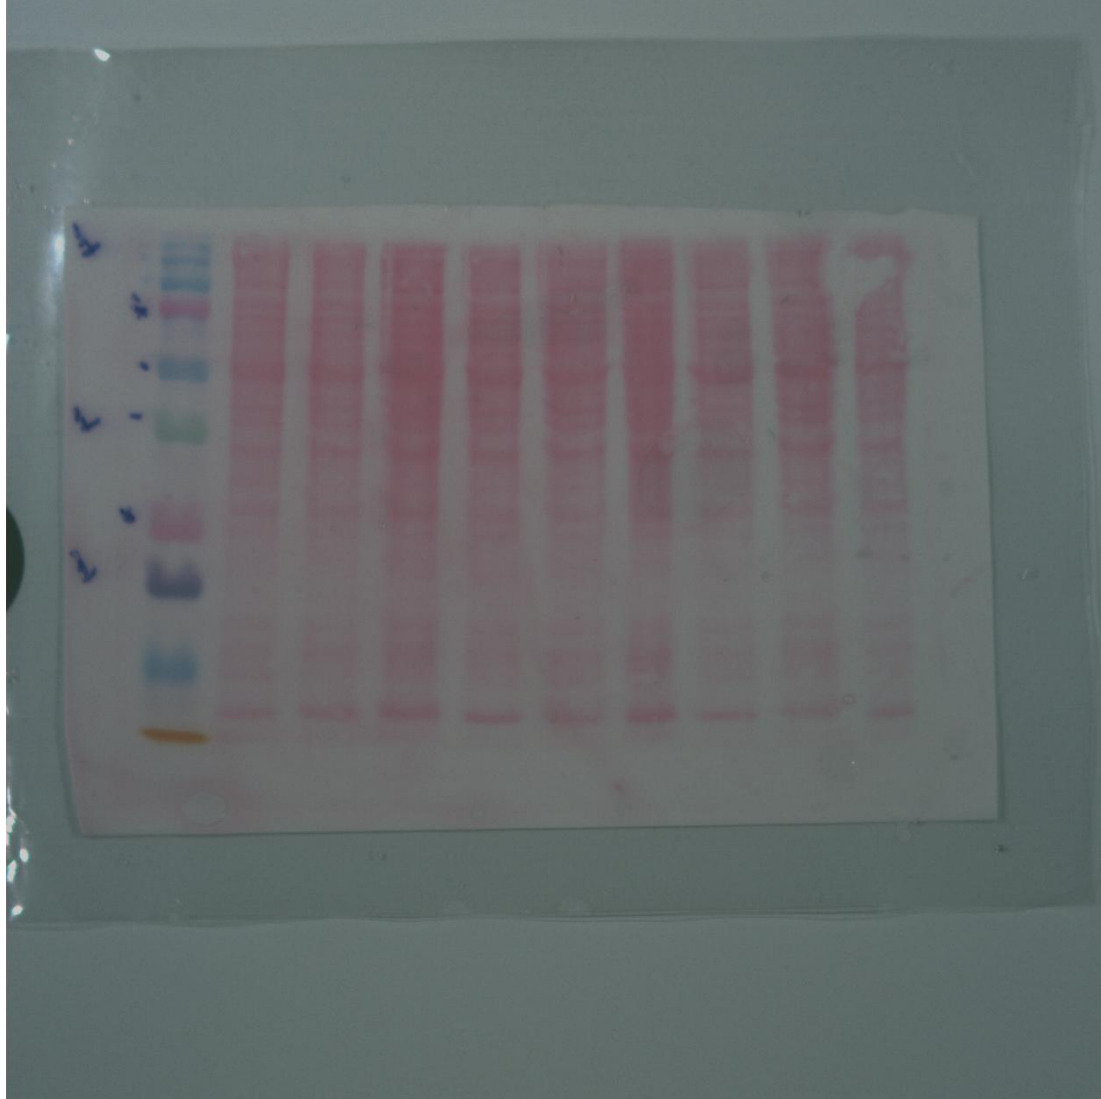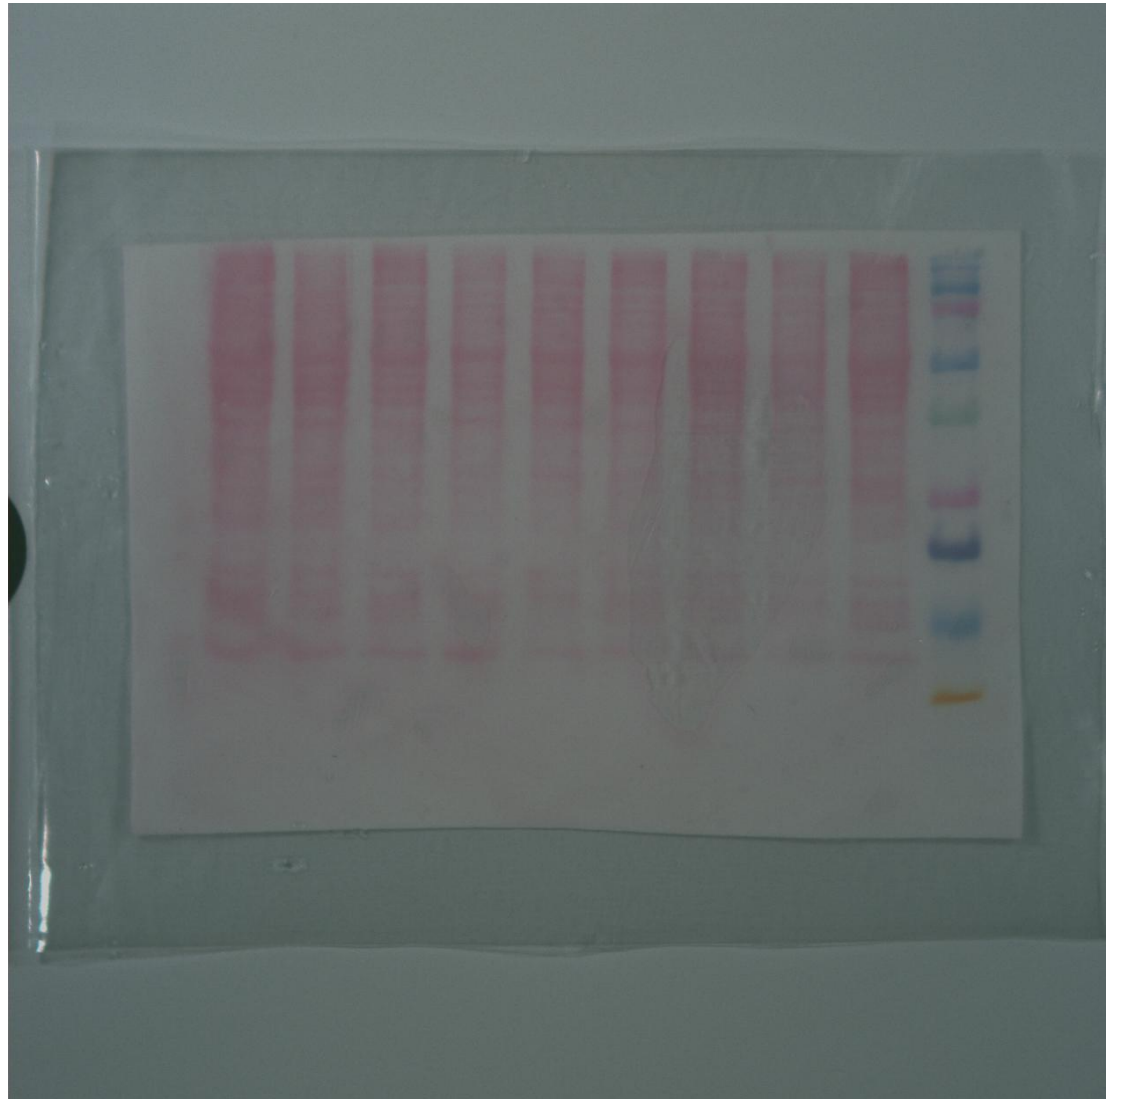

Ponceau (ctl CaMK)

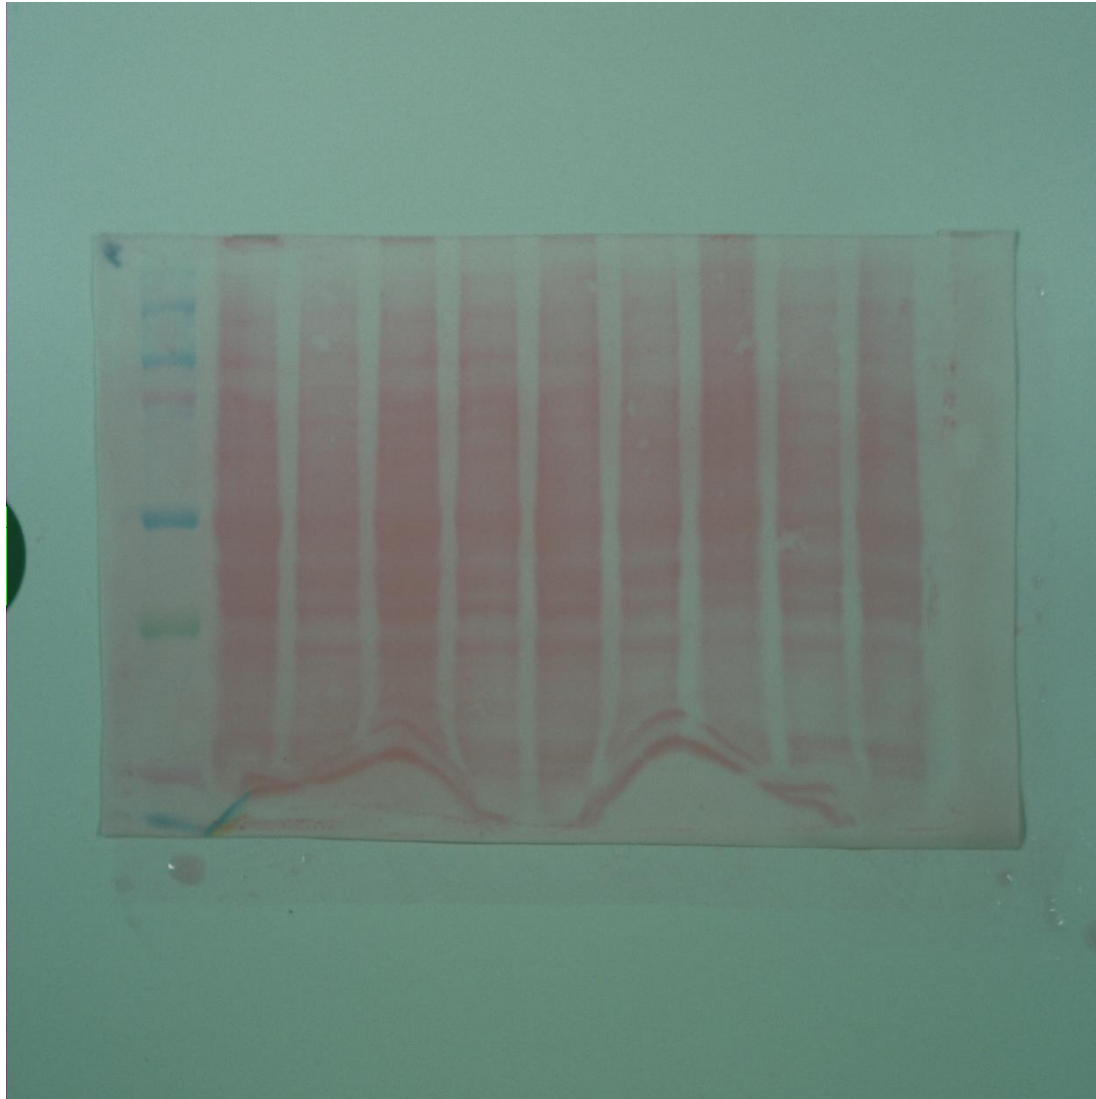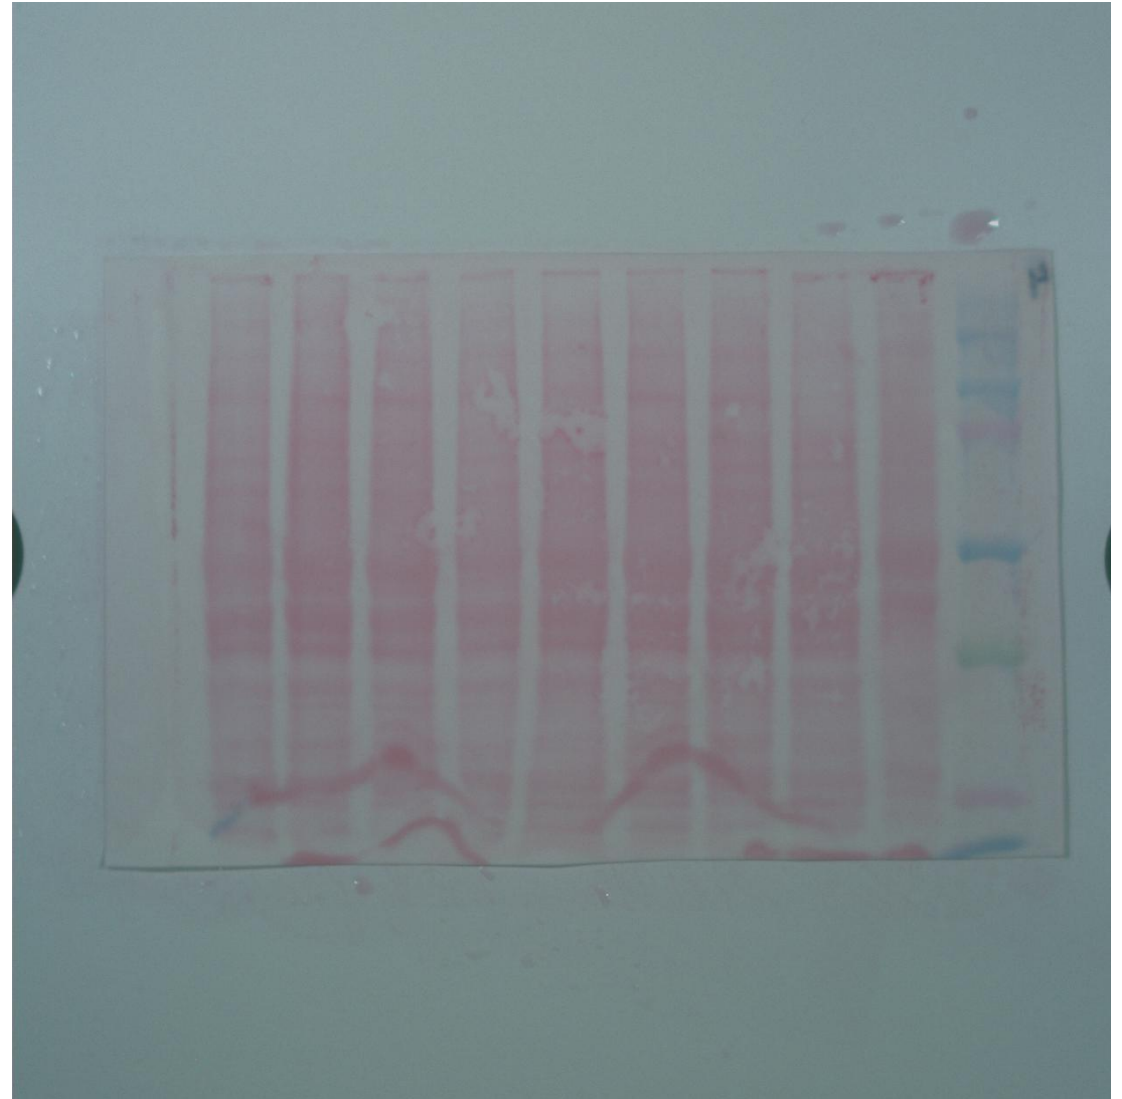

Supplement: pone.0299534.s001.pdf [file pone.0299534.s001.pdf]
